# Supplementary figures and images for: What explains the trot–gallop transition in small mammals?
Source: Oxford University Press journal article supplement (doi:10.1242/jeb.02473), 2006-10-05

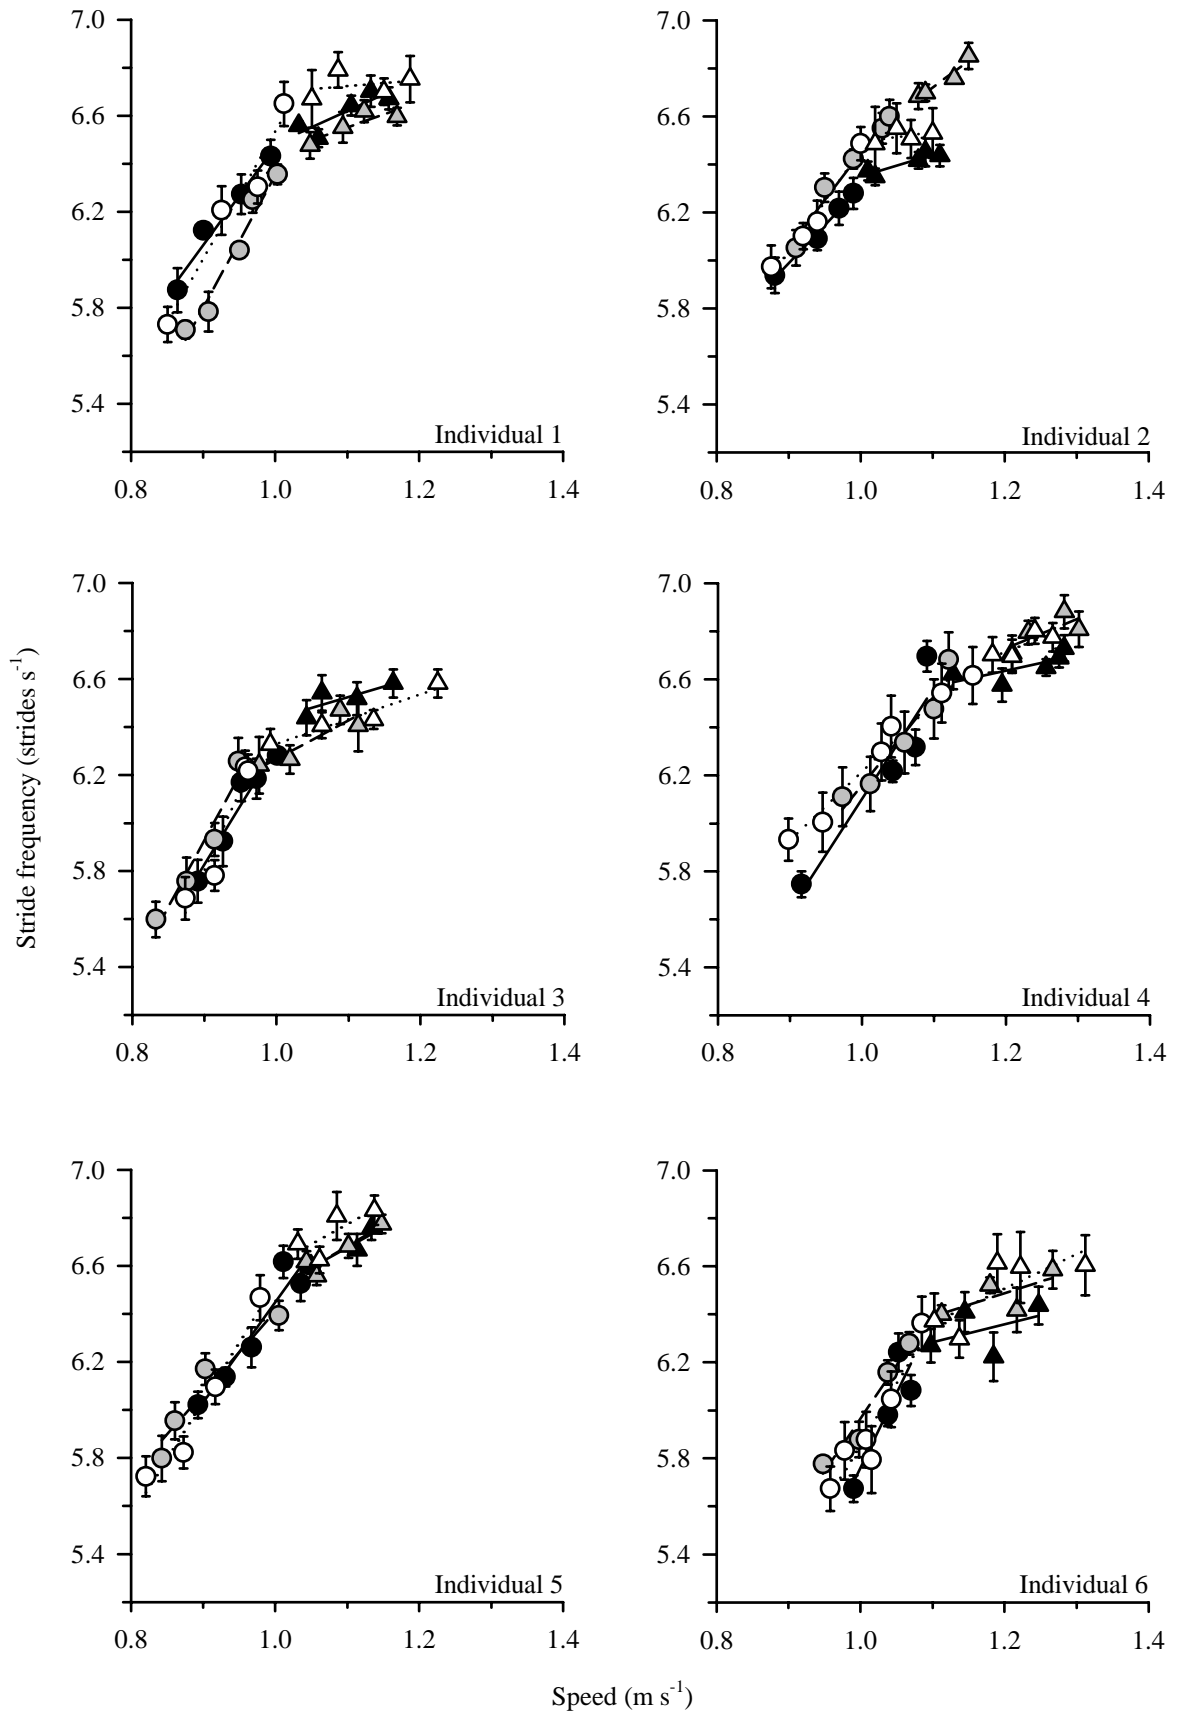

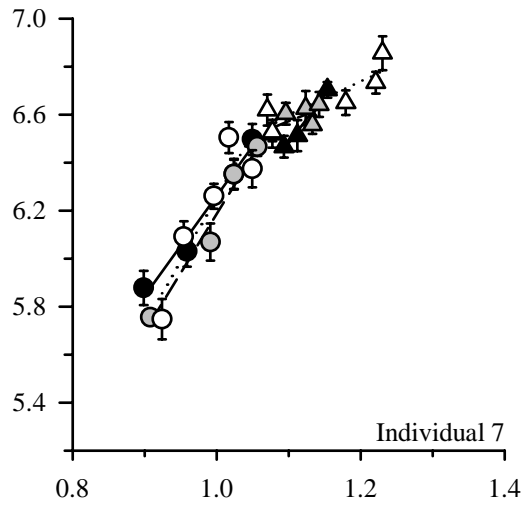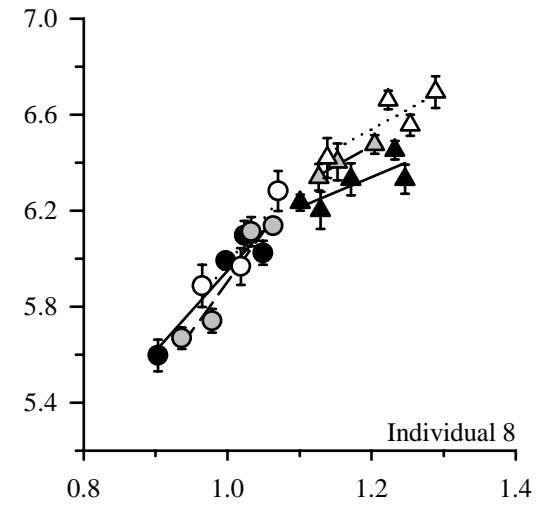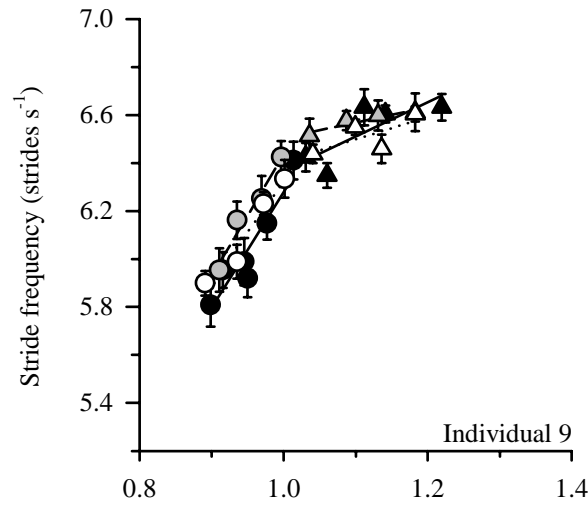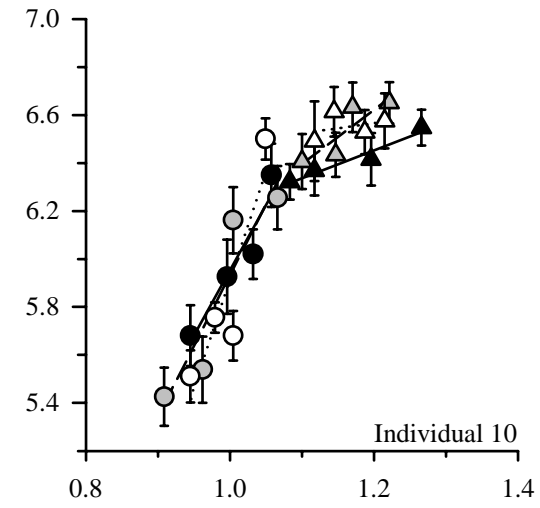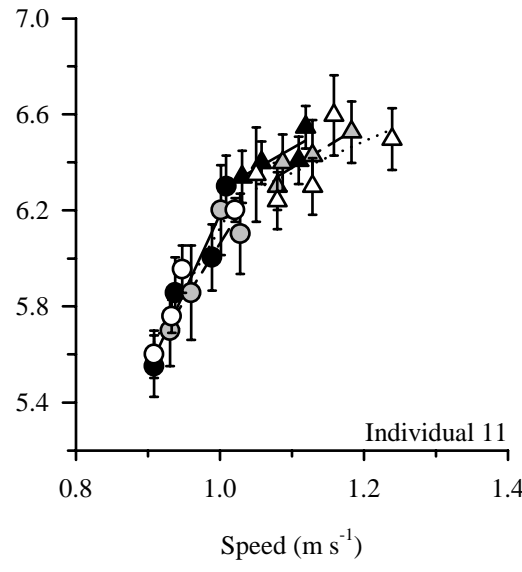

Supplement: jeb02473figs1.pdf [file jeb02473figs1.pdf]

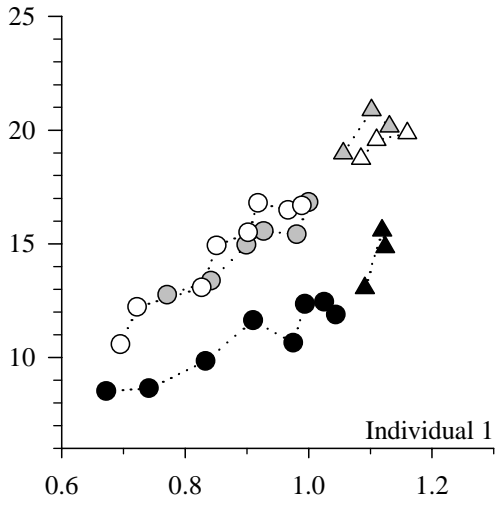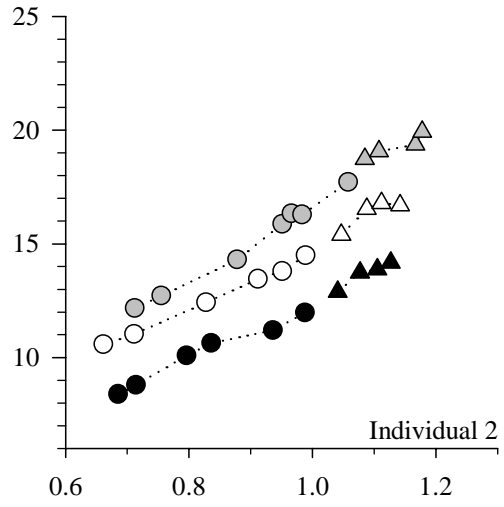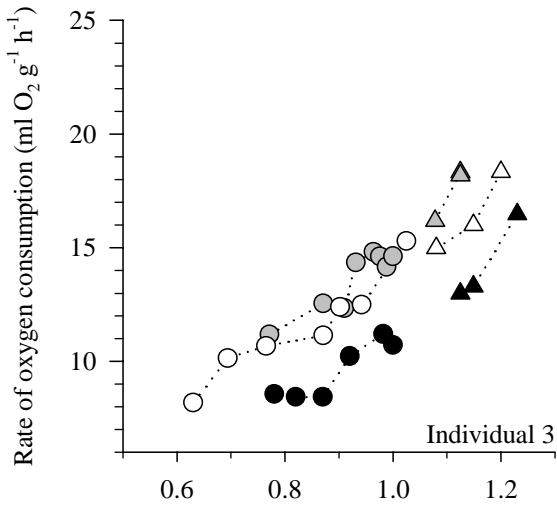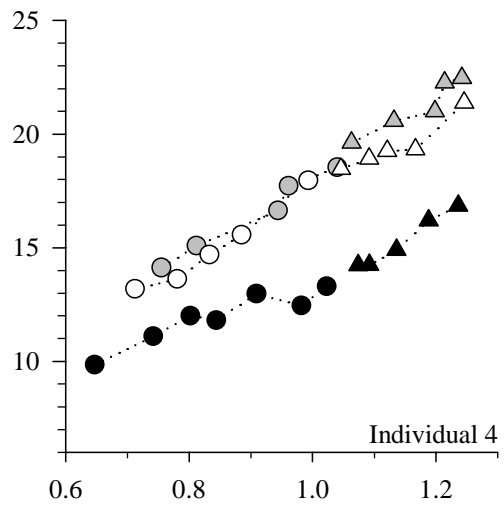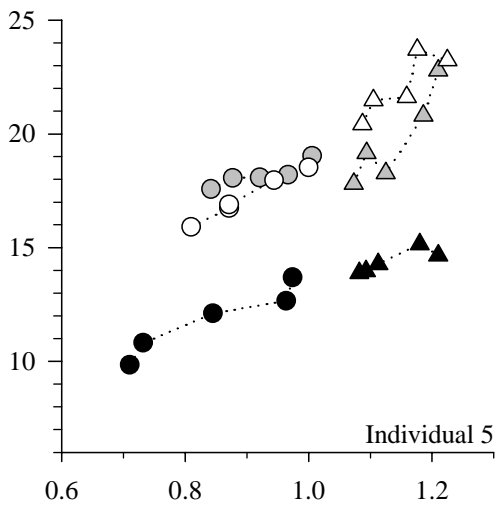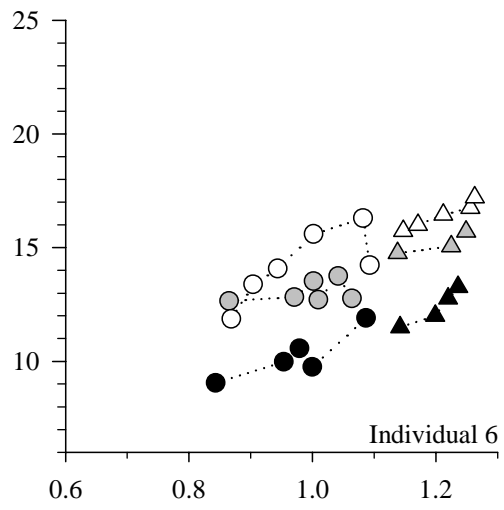

Speed ( $\text{m s}^{-1}$ )

Supplement: jeb02473figs2.pdf [file jeb02473figs2.pdf]
